# Supplementary material for: The Clinicopathological Significance of BiP/GRP-78 in Breast Cancer: A Meta-Analysis of Public Datasets and Immunohistochemical Detection
Source: MDPI journal article supplement (doi:10.3390/curroncol29120710), 2022-11-23
Supplement: s1 [file s1]

**Supplementary table S3 - Clinicopathological data of the patient cohort 2 from IPOP**

| Patient | Age at diagnosis | Histological type | Grade | Stage | Molecular subtype     | Adjuvant Treatment                 | Years until metastasis | Metastasis topography | Disease course                                                                              | Vital Status    |
|---------|------------------|-------------------|-------|-------|-----------------------|------------------------------------|------------------------|-----------------------|---------------------------------------------------------------------------------------------|-----------------|
| BCM001  | 30               | Ductal            | 2     | III   | Luminal B-like, HER2+ | CT + RT + Tamoxifen + Trastuzumab  | 11                     | Brain                 | Disease progression, under endocrine treatment (bone, adrenal, lung and ovarian metastases) | Dead of disease |
| BCM004  | 36               | Mixed             | 2     | III   | Luminal B-like, HER2+ | CT + RT + Exemestane + Trastuzumab | 10                     | Brain                 | Disease progression, under endocrine treatment (skin, bone metastases)                      | Dead of disease |
| BCM080  | 56               | Ductal            | 3     | II    | Luminal-like, HER2-   | CT + RT + Anastrozole              | 8                      | Skin                  | Disease progression (bone metastases)                                                       | Dead of disease |
| BRT3DP  | 59               | Ductal            | 3     | N/A   | Luminal-like, HER2+   | CT + RT + Tamoxifen                | 6                      | Pleural               | Disease progression, under endocrine treatment (bone, skin, lymph-node metastases)          | Dead of disease |
| BRT5DP  | 67               | Lobular           | 2     | II    | Luminal-like, HER2-   | CT + RT + Anastrozole              | 8                      | Pleural               | Disease progression (bone metastases)                                                       | Dead of disease |
| BRT6DP  | 68               | Lobular           | 2     | II    | Luminal-like, HER2-   | CT + RT + Tamoxifen→Exemestane     | 8                      | Pleural               | Disease progression, under endocrine treatment (bone, liver metastases)                     | Dead of disease |
| BRT15DP | 44               | Ductal            | 3     | III   | Luminal-like, HER2-   | CT + RT + Tamoxifen                | 5                      | Pleural               | Disease progression, under endocrine treatment (bone, brain, liver,                         | Dead of disease |

|         |    |         |   |     |                     |                                |   |         |                                                                                                 |                                 |
|---------|----|---------|---|-----|---------------------|--------------------------------|---|---------|-------------------------------------------------------------------------------------------------|---------------------------------|
|         |    |         |   |     |                     |                                |   |         | lymph-node metastases)                                                                          |                                 |
| BRT29DP | 45 | Ductal  | 2 | III | Luminal-like, HER2- | CT + RT + Tamoxifen            | 5 | Pleural | Disease progression (bone, lymph-node, liver, skin metastases)                                  | Dead of disease                 |
| BRT41DP | 66 | Ductal  | 3 | III | Luminal-like, HER2+ | CT + Anastrozole + Trastuzumab | 2 | Pleural | Disease progression (lung metastases)                                                           | Dead of disease                 |
| BRT56DP | 54 | Ductal  | 3 | I   | Luminal-like, HER2- | CT + Anastrozole               | 5 | Pleural | Disease progression, under endocrine treatment (lung, pericardium, bone, lymph-node metastases) | Dead of disease                 |
| BRT57DP | 51 | Lobular | 2 | I   | Luminal-like, HER2- | CT + Tamoxifen                 | 2 | Pleural | Disease progression, under endocrine treatment (bone, liver metastases)                         | Dead of disease                 |
| BRT67DP | 69 | Ductal  | 3 | III | Luminal-like, HER2- | CT + RT + Anastrozole          | 4 | Pleural | N/A                                                                                             | Died of stage IV gastric cancer |

Abbreviations: CT – chemotherapy; N/A – not available; RT - radiotherapy
