# Supplementary material for: The Clinicopathological Significance of BiP/GRP-78 in Breast Cancer: A Meta-Analysis of Public Datasets and Immunohistochemical Detection
Source: MDPI journal article supplement (doi:10.3390/curroncol29120710), 2022-11-23
Supplement: s1 [file s1]

**Supplementary table S2 - Clinicopathological data of the patient cohort 1 from IPOP**

| Patient | Age at diagnosis | Histological type              | Grade | Stage | Molecular subtype     | Adjuvant Treatment                                                        | Metastasis topography | Disease course               |
|---------|------------------|--------------------------------|-------|-------|-----------------------|---------------------------------------------------------------------------|-----------------------|------------------------------|
| 1       | 49               | Lobular                        | 2     | III   | Luminal B-like, HER2+ | CT + RT + Letrozol + Anastrozol                                           | N/A                   | Alive without disease        |
| 2       | 62               | Ductal                         | 2     | IV    | Luminal B-like, HER2- | CT + Letrozol                                                             | N/A                   | Alive without disease        |
| 3       | 81               | Ductal                         | 1     | II    | Luminal-like, HER2-   | Exemestan                                                                 | N/A                   | Alive without disease        |
| 4       | 48               | Lobular                        | 2     | N/A   | Luminal-like, HER2-   | CT + HT (not specified)                                                   | Multiple metastasis   | Dead of disease (metastasis) |
| 5       | 40               | Neuroendocrine differentiation | 3     | IV    | Luminal-like, HER2-   | CT + RT + Exemestan + Fulvestrant + Letrozol                              | Skin, Liver           | Dead of disease (metastasis) |
| 6       | 76               | Ductal                         | 1     | III   | Luminal-like, HER2-   | RT + Letrozol + Tamoxifen                                                 | N/A                   | Alive with disease           |
| 7       | 84               | Ductal                         | 2     | III   | Luminal-like, HER2-   | RT + Letrozol                                                             | N/A                   | Alive without disease        |
| 8       | 77               | Ductal                         | 2     | II    | Luminal-like, HER2-   | RT+ Letrozol                                                              | N/A                   | Alive without disease        |
| 9       | 69               | Mixed                          | 1     | III   | Luminal-like, HER2-   | RT+ Letrozol                                                              | N/A                   | Alive without disease        |
| 10      | 68               | Ductal                         | 3     | III   | Luminal-like, HER2+   | CT + Anastrozole + RT + Tamoxifen + Docetaxel + Fulvestrant + Palbociclib | Bone                  | Dead of disease (metastasis) |
| 11      | 75               | Ductal                         | 1     | IV    | Luminal-like, HER2-   | Letrozol + RT + Palbociclib                                               | N/A                   | Alive without disease        |
| 12      | 83               | Ductal                         | 2     | II    | Luminal-like, HER2-   | RT + Anastrozole                                                          | N/A                   | Alive without disease        |
| 13      | 74               | Ductal                         | 2     | II    | HER2-                 | RT+ Letrozol                                                              | N/A                   | Alive without disease        |
| 14      | 87               | Ductal                         | 3     | III   | HER2+                 | Anastrozole                                                               | N/A                   | Alive without disease        |

Abbreviations: CT – chemotherapy; N/A – not available; RT – radiotherapy; HT – Hormonal therapy
